# Supplementary material
Source: Springer Nature journal article supplement (https://www.springermedizin.de/resource/supplementary/12911_2013_699_MOESM1_ESM.pdf/9526470)
Supplement: MOESM1 [file 9526470]

## Study cohort:

All PHHS adult patients with first encounter between January 1, 2009 and April 1, 2011

### MODEL DERIVATION

Run model

#### Chart Selection

Stratified random sample of 500 charts

- 50% with 'diabetes'
- 25% with 'possible diabetes'
- 25% with 'no diabetes'

#### Physician Review

1. e-Model diagnosis
2. e-Model identified date of diagnosis

#### Model Adjustment

- Address systematic inaccuracies
- Point recalibration for individual e-model variables

Repeat x 2

After 3 cycles

Proceed to model validation

### MODEL VALIDATION

Run model

#### Chart Selection\*

Stratified random sample of 343 charts

- 50% with 'diabetes'
- 10% with 'possible diabetes'
- 40% with 'no diabetes'

#### Physician Review

1. e-Model diagnosis
2. e-Model identified date of diagnosis

#### Model Evaluation

1. Accuracy of e-model diagnosis
  - Kappa between e-model & physician reviewer
  - Sensitivity, specificity, PPV, NPV of e-model compared to physician gold standard
2. Accuracy of e-model identified date of diagnosis
  - Exact match between e-model date and physician gold standard
  - Match within 3 months of e-model date and physician gold standard
